# Supplementary material for: Suboptimal Performance of Hepatocellular Carcinoma Prediction Models in Patients with Hepatitis B Virus-Related Cirrhosis
Source: MDPI journal article supplement (doi:10.3390/diagnostics13010003), 2022-12-20
Supplement: s1 [file s1]

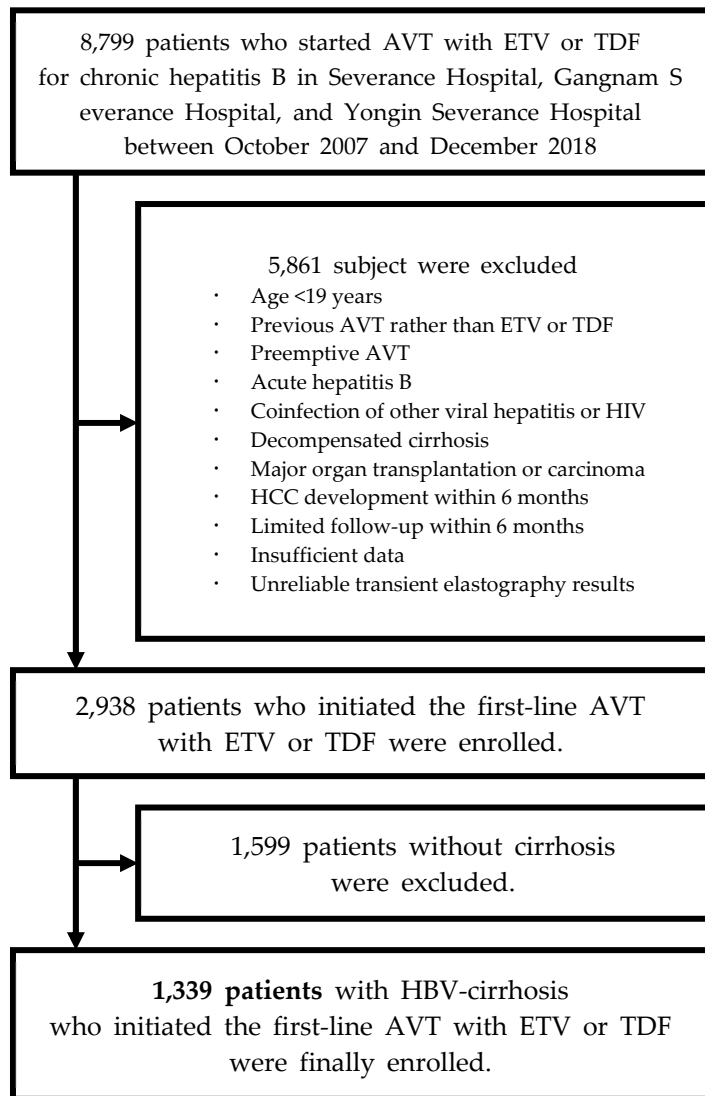

**Supplementary Figure S1.** Flowchart of the patients' selection. Abbreviation: AVT, antiviral therapy; ETV, entecavir; TDF, tenofovir disoproxil fumarate; HIV, human immunodeficiency virus; HCC, hepatocellular carcinoma; HBV, hepatitis B virus.

| Table S1. Summary of HCC prediction models |                                                                                                                                                                                                                                                                                                                                         |                                                                                             |
|--------------------------------------------|-----------------------------------------------------------------------------------------------------------------------------------------------------------------------------------------------------------------------------------------------------------------------------------------------------------------------------------------|---------------------------------------------------------------------------------------------|
| Prediction Model                           | Components                                                                                                                                                                                                                                                                                                                              | Risk Stratification<br>(Cumulative Incidence of HCC)                                        |
| PAGE-B [1]                                 | Age (16–29: 0, 30–39: 2, 40–49: 4, 50–59: 6, 60–69: 8, ≥70: 10)<br>+ Gender (male: 6, female: 0)<br>+ Platelets ( $10^3/\text{mm}^3$ ) (≥200: 0, 100–200: 6, <100: 9)                                                                                                                                                                   | Low: ≤9 (0%/5Y)<br>Intermediate: 10–17 (3–4%/5Y)<br>High: ≥18 (16–17%/5Y)                   |
| Modified PAGE-B [2]                        | Age (<30: 0, 30–39: 3, 40–49: 5, 50–59: 7, 60–69: 9, ≥70: 11)<br>+ Gender (male: 2, female: 0)<br>+ Platelets ( $10^3/\text{mm}^3$ ) (>250: 0, 200–250: 2, 150–200: 3, 100–150: 4, <100: 5)<br>+ Albumin (g/dL) (≥4.0: 0, 3.5–4.0: 1, 3.0–3.5: 2, <3.0: 3)<br>Age (1 points for every 5 years from 35 to 65 years of age [0–6 pointes]) | Low: ≤8 (0.7%/5Y)<br>Intermediate: 9–12 (5.1%/5Y)<br>High: ≥13 (18.4%/5Y)                   |
| Modified REACH-B [3]                       | + Sex (male: 2, female: 0)<br>+ ALT (IU/L) (15–45: 1, ≥45: 2)<br>+ HBeAg (positive: 2, negative: 0)<br>+ L <sub>STE</sub> (kPa) (<8.0: 0, 8.0–13.0: 2, >13.0: 4)<br>Age (<40: 0, 40–59: 5, 50–59: 8, ≥60: 10)<br>+ Gender (male: 2, female: 0)                                                                                          | Low: 0–6<br>Intermediate: 7–11<br>High: 12–13<br>(Incidence was not provided)               |
| CAMD [4]                                   | + Diabetes mellitus (diabetic: 1, not diabetic: 0)<br>+ Cirrhosis (presence with age <40: 10, presence with age ≥40: 6, absence: 0)                                                                                                                                                                                                     | Low: <8 (0.09–0.27%/3Y)<br>Intermediate: 8–13 (0.85–2.40%/3Y)<br>High: >13 (4.06–10.75%/3Y) |
| Age–Male–ALBI–Platelets score (aMAP) [5]   | $\{(0.06 \times \text{age}) + (0.89 \times \text{sex} [\text{Male: } 1; \text{Female: } 0]) + 0.48 \times ([0.66 \times \log_{10} \text{bilirubin (micromol/L)}] + [-0.085 \times \text{albumin (g/L)}]) - 0.01 \times \text{platelets (} 10^3/\text{mm}^3) + 7.4\} / 14.77 \times 100$                                                 | Low: 1–50 (0.8%/5Y)<br>Intermediate: 50–60 (4.2%/5Y)<br>High: 60–100 (19.9%/5Y)             |
| Toronto HCC Risk Index (THRI) [6]          | Age (<45: 0, 45–60: 50, >60: 100)<br>+ Etiology (Autoimmune: 0, HCV on SVR: 0, steatohepatitis: 54, HBV or HCV: 97, other: 36)                                                                                                                                                                                                          | Low: 0–120 (0.3%/Y)<br>Intermediate: 120–240                                                |

|                     |                                                                                                                                       |                                 |
|---------------------|---------------------------------------------------------------------------------------------------------------------------------------|---------------------------------|
|                     | + Gender (male: 80, female: 0)                                                                                                        | (1.0%/Y)                        |
|                     | + Platelets ( $10^3/\text{mm}^3$ ) (>200: 0, 140–200: 20, 80–139: 70, <80: 89)                                                        | High: 240–366 (3.2%/Y)          |
|                     | Age (<40: 0, 40–59: 1, 50–59: 2, 60–69: 3, ≥70: 4)                                                                                    | Low: 0–5                        |
| APA-B [7]           | + Platelets ( $10^3/\text{mm}^3$ ) (≥130: 0, 100–129: 3, <100: 6)                                                                     | Intermediate: 6–9               |
|                     | + AFP (ng/mL) (<5: 0, 5–9: 2, >9: 5)                                                                                                  | High: 10–15                     |
|                     | (all variables at 12 months after ETV administration)                                                                                 | (Incidence was not provided)    |
| Age, Albumin, Sex,  | Age (<30: 0, 30–39: 2, 40–49: 4, 50–59: 6, 60–69: 8, ≥70: 10)                                                                         | Low: 0–5 (0.0%/5Y)              |
| Liver cirrhosis-    | + Sex (male: 3, female: 0)                                                                                                            | Intermediate: 6–19              |
| HCC score           | + Cirrhosis (presence: 11, absence: 0)                                                                                                | (3.7%/5Y)                       |
| (AASL-HCC) [8]      | + Albumin (g/dL) (≥3.5: 0, 2.8–3.4: 3, <2.8: 5)                                                                                       | High: 20–29 (17.6%/5Y)          |
| HCC-Risk            |                                                                                                                                       | Low: ≤64 (0.5%/5Y)              |
| Estimating Score in | Age (year)                                                                                                                            | Intermediate: 65–84             |
| CHB patients        | + Gender (male: 15, female: 0)                                                                                                        | (14.4%/5Y)                      |
| Under Entecavir     | + Cirrhosis (presence: 23, absence: 0)                                                                                                | High: ≥85 (37.1%/5Y)            |
| (HCC-RESCUE) [9]    |                                                                                                                                       | Minimal: 0.000–0.075            |
| Prediction of Liver | Calculation using the published Python code available in online                                                                       | (0.5%/8Y)                       |
| cancer using        | ( <a href="https://github.com/vitaldb/hbvhcc/blob/main/predict.ipynb">https://github.com/vitaldb/hbvhcc/blob/main/predict.ipynb</a> ) | Low: 0.075–0.250 (3.8%/8Y)      |
| Artificial          |                                                                                                                                       | Intermediate: 0.250–0.500       |
| intelligence-driven | Components: Baseline age, sex, HBeAg positivity, cirrhosis, TDF vs.                                                                   | (16.8%/8Y)                      |
| model for Network   | ETV, HBV DNA titer, ALT, albumin, bilirubin, platelet counts, and                                                                     | High: 0.500–1.000               |
| - hepatitis B       | racess [Asian vs. Caucasian])                                                                                                         | (35.2%/8Y)                      |
| (PLAN-B) [10]       |                                                                                                                                       | CAGE-B                          |
|                     |                                                                                                                                       | Low: 0–5 (0%/5–12Y)             |
|                     | Based on year 5 variables after AVT                                                                                                   | Intermediate: 6–10 (1.8%/5–12Y) |
| CAGE-B              | Age (23–29: 0, 30–39: 2, 40–49: 4, 50–59: 6, 60–69: 8, ≥70: 10) +                                                                     |                                 |
| and                 | ① CAGE-B: ( $LS_{TE} < 12$ kPa with CHB: 0, <12 kPa with cirrhosis: 3, ≥12                                                            | High: 11–16 (15.4%/5–12/Y)      |
| SAGE-B [11]         | kPa with cirrhosis: 6)                                                                                                                |                                 |
|                     | ② SAGE-B: ( $LS_{TE} < 12$ kPa: 0, ≥12 kPa: 5)                                                                                        | SAGE-B                          |
|                     |                                                                                                                                       | Low: 0–5 (0%/5–12Y)             |
|                     |                                                                                                                                       | Intermediate: 6–10 (4.0%/5–     |

12Y)

High: 11–16 (13.8%/5–12Y)

---

Abbreviation: HCC, hepatocellular carcinoma; ALT, alanine aminotransferase; HBeAg, hepatitis B e antigen; L<sub>STE</sub>, liver stiffness value measured by transient elastography; HCV, hepatitis C virus; SVR, sustained virologic response; HBV, hepatitis B virus; AFP, alpha-fetoprotein; ETV, entecavir; TDF, tenofovir disoproxil fumarate

---

Table S2. Univariate Cox regression analysis for the development of hepatocellular carcinoma.

| Variable                                     | Univariate Analysis |                       |
|----------------------------------------------|---------------------|-----------------------|
|                                              | <i>P</i> Value      | Hazard Ratio (95% CI) |
| Age (year)                                   | <0.001              | 1.027 (1.012, 1.042)  |
| Male sex                                     | 0.837               | 1.029 (0.785, 1.350)  |
| Diabetes mellitus                            | 0.032               | 1.464 (1.033, 2.075)  |
| HBeAg positivity                             | 0.012               | 1.416 (1.079, 1.857)  |
| TDF use (vs. ETV)                            | 0.183               | 1.209 (0.914, 1.599)  |
| Platelet count ( $\times 10^3/\mu\text{L}$ ) | <0.001              | 0.994 (0.991, 0.996)  |
| Total bilirubin (mg/dL)                      | 0.048               | 1.051 (1.000, 1.104)  |
| Serum albumin (g/dL)                         | <0.001              | 0.469 (0.386, 0.569)  |
| Prothrombin time (INR)                       | 0.014               | 1.538 (1.092, 2.167)  |
| Aspartate aminotransferase (IU/L)            | 0.068               | 1.001 (1.000, 1.001)  |
| Alanine aminotransferase (IU/L)              | 0.681               | 1.000 (0.999, 1.001)  |
| Alpha-fetoprotein (ng/mL) ( $n = 910$ )      | 0.004               | 1.003 (1.001, 1.005)  |
| Liver stiffness value <sup>†</sup> (kPa)     | <0.001              | 1.025 (1.017, 1.034)  |
| Log HBV DNA (IU/mL)                          | 0.343               | 1.056 (0.944, 1.180)  |

<sup>†</sup>Measured using transient elastography (FibroScan®, EchoSens, Paris, France)

Abbreviation: CI, confidence interval; HBeAg, hepatitis B e-antigen; TDF, tenofovir disoproxyl fumarate; INR, international normalized ratio

| Table S3. Comparison of predictive performance between the modified REACH-B and other HCC risk-prediction models |                                                                |
|------------------------------------------------------------------------------------------------------------------|----------------------------------------------------------------|
| Scoring Systems                                                                                                  | Differences of Integrated AUC* (95% CI) vs. modified REACH-B   |
| PAGE-B                                                                                                           | -0.070 (-0.106, -0.036)                                        |
| Modified PAGE-B                                                                                                  | -0.032 (-0.064, -0.003)                                        |
| CAMD                                                                                                             | -0.090 (-0.123, -0.054)                                        |
| aMAP                                                                                                             | -0.034 (-0.067, -0.001)                                        |
| HCC-RESCUE                                                                                                       | -0.084 (-0.115, -0.052)                                        |
| AASL-HCC                                                                                                         | -0.053 (-0.086, -0.023)                                        |
| Toronto HCC Risk Index                                                                                           | -0.071 (-0.104, -0.036)                                        |
| PLAN-B                                                                                                           | -0.030 (-0.066, 0.006)                                         |
| APA-B ( <i>n</i> = 910) <sup>†</sup>                                                                             | -0.011 (-0.055, 0.034) (vs. 0.666 [0.628, 0.703]) <sup>†</sup> |
| CAGE-B ( <i>n</i> = 808) <sup>‡</sup>                                                                            | -0.034 (-0.076, 0.007) (vs. 0.656 [0.616, 0.699]) <sup>‡</sup> |
| SAGE-B ( <i>n</i> = 808) <sup>‡</sup>                                                                            | -0.020 (-0.063, 0.022) (vs. 0.656 [0.616, 0.699]) <sup>‡</sup> |

\* Integrated AUC were calculated up to 8 years after initiating AVT using 1000 time bootstrap sampling

<sup>†</sup> APA-B and modified REACH-B were calculated for HCC development after 6 months in 910 patients with baseline alpha-fetoprotein result.

<sup>‡</sup> CAGE-B and SAGE-B were calculated for HCC development after 18 months in 808 patients with follow-up transient elastography results after 12 months.

Abbreviation: HCC, hepatocellular carcinoma; CI, confidence interval; AUC, area under the receiver operating characteristic curve

| Table S4. Baseline clinical characteristics of the study population who underwent transient elastography after 1 year of antiviral therapy and did not develop HCC within 18 months after antiviral therapy |                         |                               |                       |                |  |
|-------------------------------------------------------------------------------------------------------------------------------------------------------------------------------------------------------------|-------------------------|-------------------------------|-----------------------|----------------|--|
| Variables                                                                                                                                                                                                   | Total ( <i>n</i> = 808) | Without HCC ( <i>n</i> = 694) | HCC ( <i>n</i> = 114) | <i>P</i> Value |  |
| Age (year)                                                                                                                                                                                                  | 54 (47, 59)             | 53 (46, 59)                   | 56 (49, 61)           | 0.006          |  |
| <40                                                                                                                                                                                                         | 53 (6.6)                | 50 (7.2)                      | 3 (2.6)               |                |  |
| 40–50                                                                                                                                                                                                       | 217 (26.9)              | 191 (27.5)                    | 26 (22.8)             |                |  |
| 50–60                                                                                                                                                                                                       | 336 (41.6)              | 285 (41.1)                    | 51 (44.7)             | 0.182          |  |
| 60–70                                                                                                                                                                                                       | 168 (20.8)              | 138 (19.9)                    | 30 (26.3)             |                |  |
| ≥70                                                                                                                                                                                                         | 24 (3.0)                | 20 (2.9)                      | 4 (3.5)               |                |  |
| Male sex                                                                                                                                                                                                    | 447 (55.3)              | 385 (55.5)                    | 62 (54.4)             | 0.908          |  |
| Diabetes mellitus                                                                                                                                                                                           | 107 (13.2)              | 89 (12.8)                     | 18 (15.8)             | 0.474          |  |
| HBeAg positivity                                                                                                                                                                                            | 314 (38.9)              | 259 (37.3)                    | 55 (48.2)             | 0.034          |  |
| TDF use (vs. ETV)                                                                                                                                                                                           | 413 (51.1)              | 357 (51.4)                    | 56 (49.1)             | 0.721          |  |
| Laboratory test results                                                                                                                                                                                     |                         |                               |                       |                |  |
| Platelet count (×10 <sup>3</sup> /μL)                                                                                                                                                                       | 135 (100, 171)          | 137 (103, 173)                | 122 (93, 156)         | 0.002          |  |
| Total bilirubin (mg/dL)                                                                                                                                                                                     | 0.9 (0.7, 1.3)          | 0.9 (0.7, 1.2)                | 0.9 (0.7, 1.4)        | 0.346          |  |
| Serum albumin (g/dL)                                                                                                                                                                                        | 4.2 (3.9, 4.4)          | 4.2 (3.9, 4.4)                | 4.0 (3.6, 4.3)        | <0.001         |  |
| Prothrombin time (INR)                                                                                                                                                                                      | 1.02 (0.99, 1.10)       | 1.01 (0.99, 1.09)             | 1.04 (0.99, 1.14)     | 0.022          |  |
| Aspartate aminotransferase (IU/L)                                                                                                                                                                           | 39 (28, 59)             | 37 (27, 56)                   | 50 (40, 79)           | <0.001         |  |
| Alanine aminotransferase (IU/L)                                                                                                                                                                             | 38 (25, 62)             | 37 (25, 59)                   | 48 (33, 82)           | <0.001         |  |
| Alpha-fetoprotein (ng/mL) ( <i>n</i> = 603)                                                                                                                                                                 | 4.49 (2.73, 8.35)       | 4.02 (2.59, 7.39)             | 6.44 (4.56, 19.1)     | <0.001         |  |
| Liver stiffness value <sup>†</sup> (kPa)                                                                                                                                                                    | 10.8 (7.4, 16.7)        | 10.3 (7.1, 15.9)              | 12.9 (9.3, 18.4)      | <0.001         |  |
| 1 year after AVT (kPa) ( <i>n</i> = 808)                                                                                                                                                                    | 8.8 (6.3, 13.1)         | 8.6 (6.1, 12.4)               | 11.6 (8.4, 16.1)      | <0.001         |  |
| Follow-up and treatment duration (month)                                                                                                                                                                    | 59.2 (39.5, 76.7)       | 62.0 (41.0, 77.1)             | 48.1 (29.9, 69.4)     | <0.001         |  |

Values are expressed as a n (%) or median (interquartile range).

<sup>†</sup>Measured using transient elastography (FibroScan®, EchoSens, Paris, France)

Abbreviations: HCC, hepatocellular carcinoma; TDF, tenofovir disoproxil fumarate; ETV, entecavir; HBeAg, hepatitis B e antigen; AST, aspartate aminotransferase; ALT, alanine aminotransferase; INR, international normalized ratio

---

## References

1. Papatheodoridis, G.; Dalekos, G.; Sypsa, V.; Yurdaydin, C.; Buti, M.; Goulis, J.; Calleja, J.L.; Chi, H.; Manolakopoulos, S.; Mangia, G. *et al.* Page-b predicts the risk of developing hepatocellular carcinoma in caucasians with chronic hepatitis b on 5-year antiviral therapy. *Journal of hepatology* **2016**, *64*, 800-806.
2. Kim, J.H.; Kim, Y.D.; Lee, M.; Jun, B.G.; Kim, T.S.; Suk, K.T.; Kang, S.H.; Kim, M.Y.; Cheon, G.J.; Kim, D.J. *et al.* Modified page-b score predicts the risk of hepatocellular carcinoma in asians with chronic hepatitis b on antiviral therapy. *Journal of hepatology* **2018**, *69*, 1066-1073.
3. Jung, K.S.; Kim, S.U.; Song, K.; Park, J.Y.; Kim, D.Y.; Ahn, S.H.; Kim, B.K.; Han, K.H. Validation of hepatitis b virus-related hepatocellular carcinoma prediction models in the era of antiviral therapy. *Hepatology (Baltimore, Md.)* **2015**, *62*, 1757-1766.
4. Hsu, Y.C.; Yip, T.C.; Ho, H.J.; Wong, V.W.; Huang, Y.T.; El-Serag, H.B.; Lee, T.Y.; Wu, M.S.; Lin, J.T.; Wong, G.L. *et al.* Development of a scoring system to predict hepatocellular carcinoma in asians on antivirals for chronic hepatitis b. *Journal of hepatology* **2018**, *69*, 278-285.
5. Fan, R.; Papatheodoridis, G.; Sun, J.; Innes, H.; Toyoda, H.; Xie, Q.; Mo, S.; Sypsa, V.; Guha, I.N.; Kumada, T. *et al.* Amap risk score predicts hepatocellular carcinoma development in patients with chronic hepatitis. *Journal of hepatology* **2020**, *73*, 1368-1378.
6. Sharma, S.A.; Kowgier, M.; Hansen, B.E.; Brouwer, W.P.; Maan, R.; Wong, D.; Shah, H.; Khalili, K.; Yim, C.; Heathcote, E.J. *et al.* Toronto hcc risk index: A validated scoring system to predict 10-year risk of hcc in patients with cirrhosis. *Journal of hepatology* **2017**, doi:10.1016/j.jhep.2017.07.033.
7. Chen, C.H.; Lee, C.M.; Lai, H.C.; Hu, T.H.; Su, W.P.; Lu, S.N.; Lin, C.H.; Hung, C.H.; Wang, J.H.; Lee, M.H. *et al.* Prediction model of hepatocellular carcinoma risk in asian patients with chronic hepatitis b treated with entecavir. *Oncotarget* **2017**, *8*, 92431-92441.
8. Yu, J.H.; Suh, Y.J.; Jin, Y.J.; Heo, N.Y.; Jang, J.W.; You, C.R.; An, H.Y.; Lee, J.W. Prediction model for hepatocellular carcinoma risk in treatment-naïve chronic hepatitis b patients receiving entecavir/tenofovir. *Eur J Gastroenterol Hepatol* **2019**, *31*, 865-872.
9. Sohn, W.; Cho, J.Y.; Kim, J.H.; Lee, J.I.; Kim, H.J.; Woo, M.A.; Jung, S.H.; Paik, Y.H. Risk score model for the development of hepatocellular carcinoma in treatment-naïve patients receiving oral antiviral treatment for chronic hepatitis b. *Clinical and molecular hepatology* **2017**, *23*, 170-178.
10. Kim, H.Y.; Lampertico, P.; Nam, J.Y.; Lee, H.C.; Kim, S.U.; Sinn, D.H.; Seo, Y.S.; Lee, H.A.; Park, S.Y.; Lim, Y.S. *et al.* An artificial intelligence model to predict hepatocellular carcinoma risk in korean and caucasian patients with chronic hepatitis b. *Journal of hepatology* **2022**, *76*, 311-318.
11. Papatheodoridis, G.V.; Sypsa, V.; Dalekos, G.N.; Yurdaydin, C.; Van Boemmel, F.; Buti, M.; Calleja, J.L.; Chi, H.; Goulis, J.; Manolakopoulos, S. *et al.* Hepatocellular carcinoma prediction beyond year 5 of oral therapy in a large cohort of caucasian patients with chronic hepatitis b. *Journal of hepatology* **2020**, *72*, 1088-1096.
